1           **How long is long enough? Decreasing on plant extract lethal effects, over**  
2                           **time, affecting *Aedes aegypti* larval mortality**

3

4           *Short title: Aedes aegypti* mortality by plant extracts

5

6           Gilberto Dinis Cozzer<sup>1¶</sup>; Renan de Souza Rezende<sup>1¶</sup>; Junir Antônio Lutinski<sup>2&</sup>; Walter  
7           Antônio Roman Junior<sup>2&</sup>; Maria Assunta Busato<sup>2&</sup>; Jacir Dal Magro; Daniel Albeny-  
8           Simões<sup>1¶\*</sup>

9

10          <sup>1</sup> Environmental Sciences Department, Community University of Chapecó Region, Chapecó,  
11          Santa Catarina, Brazil.

12          <sup>2</sup> Health Sciences Department, Community University of Chapecó Region, Chapecó, Santa  
13          Catarina, Brazil.

14

15          \*Corresponding author:  
16          E-mail: [danielalbeny@unochapeco.edu.br](mailto:danielalbeny@unochapeco.edu.br) (DAS)

17

18          ¶ These authors contributed equally to this work

19          & These authors also contributed equally to this work

20

21

22

23

## 24 **Abstract**

25

26 The mosquito *Aedes aegypti* has overcome all kinds of human being mosquito control attempts  
27 over the last century. Strategies for vector population control resorts to the use of synthetic  
28 insecticides, which can lead to problems of intoxication in humans and environmental  
29 contamination. We evaluated the effects of *Bacillus thuringiensis* var. *israelensis* (Bti), *Ilex*  
30 *paraguariensis* (mate-herb) and *Ilex theezans* (caúna-herb) extracts against *A. aegypti* larvae  
31 mortality. The bioassays were conducted under controlled laboratory conditions of temperature  
32 ( $27\pm 3^{\circ}\text{C}$ ) and photoperiod (12h). Hydroalcoholic *I. theezans* leaves extract displayed better  
33 residual effect compared to *I. paraguariensis* fruit aqueous extract. Variation in larval mortality  
34 was also observed in the exposure periods (low after a few weeks). Low mortality after a few  
35 weeks may mean increased the food for mosquito in a oppose effect over time. The residual effect  
36 of *Bti* was observed during the 56 days of the study duration (100% of mortality). The strongest  
37 residual effect of *I. theezans* was probably due to the presence of chemical on its leaves, such  
38 coumarins, hemolytic saponins and cyanogenic glucosides, absent in *I. paraguariensis*. On the  
39 other hand, alternative methods to vector control present risks in a long term scale by reversal of  
40 larvicide effect into food resource. Our results contributed to the prospection of natural insecticides  
41 and open the possibility for subsequent studies of the use of plant extracts in field situations in a  
42 short time scale.

43

44 **Keywords:** Dengue, vector control, insecticide, entomology, yerba mate.

## 45 **Introduction**

46 Over the last century the mosquito *Aedes aegypti* Linnaeus, 1762 has overcome all  
47 mosquito control attempts by human being. *Aedes* females are well known by their capacity of  
48 naturally and/or under laboratory conditions replicate and transmit over 100 kinds of viruses [1].  
49 As an example, in Brazil dengue, chikungunya, zika and most recently mayaro [1] viruses are a  
50 real threat to public health [2]. It became necessary the *A. aegypti* population control in order to  
51 reduce viruses' transmission and consequently the epidemic status. Although several chemical and  
52 natural products have being extensively used on attempts to reduce adults and immature mosquito  
53 population [3,4], appropriated mosquito population reduction is not close to come true. Especially  
54 because the gene resistance selectivity due to chemicals and natural products application misuse  
55 [5]. Accordingly, the most effective disease prevention method still remains targeting the mosquito  
56 population by elimination of mosquito breeding places [6].

57 A very promising field for mosquito population reduction is focusing the mosquito control  
58 strategies on the immature aquatic stages, when the insect is more vulnerable [7,8]. For this  
59 purpose, the use of synthetic insecticides is well known as being quite effective causing mosquito  
60 larvae mortality [9–13]. However, those chemicals might affect humans causing intoxication and  
61 environmental contamination, affecting biodiversity [9,10,12,13]. For the environment, the  
62 continuous use of synthetic insecticides may present undesirable effects, such as the long-term  
63 residence in the environment, selection of resistant populations and the appearance of new pests  
64 [10,12,13]. Regarding to the human health, the presence of such synthetic chemicals on the  
65 environment can cause neurological damage, and is associated with a wide range of symptoms,  
66 with significant deficits in nervous system function [14].

67           Alternatively to the use of synthetic chemicals, biological control play an important role  
68 on mosquito control [15,16]. The use of bacteria spores as a mosquito larvicidal has been  
69 highlighted among the several components that are part of the mosquito integrated management  
70 program [15]. In the last decades, the use of inactivated spores of the *Bacillus thuringiensis* var.  
71 *israelensis* (Bti) bacteria spread into the mosquito breeding places water, has accomplished  
72 desired results, reaching mortality rates above 99% [17,18]. Additionally, during the last few years,  
73 plant derived compounds have been extensively used as an alternative method for controlling  
74 mosquitoes, not only because it is a new insecticidal agent, but also because it has been described  
75 as being environmental friendly [11,19–21]. The use of natural insecticides has some advantages  
76 over traditional synthetic products, since natural products are potentially less toxic to the  
77 environment. Environmental friendly compounds are less concentrated, have faster degradation  
78 and are specific to certain insect groups, resulting in less occupational exposure and less  
79 environmental pollution [22].

80           *Ilex paraguariensis* A. St.-Hil (Aquifoliaceae), known as “*Mate*” is an abundant plant [23],  
81 native of South America, twenty meters tall, endowed with dense crown and very branched [23].  
82 *I. paraguariensis* leaves, after processing, are traditionally used to prepare a regional tea known  
83 as “*Chimarrão*” in Argentina, Brazil, Paraguay and Uruguay [23]. *I. paraguariensis* is  
84 commercially interesting due to caffeine and theobromine presence, both, recognized by  
85 displaying a nervous and cardiocirculatory systems stimulant effect [24]. The described  
86 pharmacological activities for *I. paraguariensis* leaf extracts include antioxidant, hypolipidemic  
87 [25,26] and hypoglycemic effects [27]. Also, *Ilex theezans* Mart. Ex Reissek (Aquifoliaceae),  
88 popularly known as cauna, is commonly found at southern Brazil [23]. It is well known due to the  
89 physiological characteristics of its leaves as adulterant of *I. paraguariensis* [28]. It is an evergreen

90 tree, early secondary or late secondary species [23], 20 meters long by 70 cm diameter average  
91 [28]. Both, *I. paraguariensis* fruit extract and *I. theezans* hydroalcoholic leaves extracts have  
92 larvicidal effect against *A. aegypti* larvae [9,20].

93 There are studies showing that *Ilex* spp. leaves and fruit extracts kill *A. aegypti* larvae  
94 within a 24h observational time [9,20]. However, there are no studies on the current literature  
95 evaluating the effects of time on the bioinsecticides lethal activity. How long is long enough for  
96 the bioinsecticide to still keep the mosquito larvae killing activity? [29–31]. In this context, we  
97 evaluated the lethal residual effect of *B. thuringiensis* var. *israelensis*, and leaves and fruits extracts  
98 of *I. theezans*, and *I. paraguariensis* (respectively), on *A. aegypti* larvae survivorship. We  
99 hypothesized that time would positively affect *A. aegypti* larvae survival due to the plant extracts  
100 lethal compounds decay, but the mortality caused by *I. theezans* would be higher compared to  
101 *I. paraguariensis* due to the difference in physical and chemical characteristics.

102

## 103 **Materials and Methods**

### 104 **Animal source**

105 The *A. aegypti* larvae used in this experiment were provided by the Laboratório de  
106 Entomologia Ecológica (LABENT-Eco) mosquito colony. A filter paper holding about 300 eggs  
107 was placed in a plastic tray (30x20cm) holding 1L of tap dechlorinated water. After hatching the  
108 larvae were split among 3 equal size, above described, plastic tray and feed with 2g of fish food.  
109 The mosquito larvae were raised for about 4-5 days until reaching 3<sup>rd</sup> and 4<sup>rd</sup> instars.

110

### 111 **Plant source and extracts preparation**

112 Fruits and leaves were obtained from native trees located at the Marechal Bormann district  
113 (27 ° 19'05 "S; 52 ° 65'11"W), Chapecó (SC), in December, 2016. The plant parts were dehydrated  
114 at room temperature ( $\pm 20^{\circ}\text{C}$ ), pulverized in a knife mill (Cielamb®, CE 430) and stored away  
115 from light and moisture. The plant extracts were done according to Busato *et al.* (2015) and  
116 Knakiewicz *et al.* (2016). We took a sample of twenty grams of *I. paraguariensis* dehydrated fruits  
117 and *I. theezans* leaves. Both samples were extracted by turbolysis using 200ml of distilled and  
118 deionized water and a hydroalcoholic solution (90% ethanol; 200 ml) as the solvent, respectively  
119 [32]. The extracts were filtered in Büchner, rotavapor concentrated under reduced pressure,  
120 lyophilized, weighed, identified and stored in a freezer at  $-20^{\circ}\text{C}$ . Hydroalcoholic and aqueous  
121 extracts were prepared using *I. theezans* and *I. paraguariensis* leaves and fruits, respectively. We  
122 used leaves in a concentration of  $1000\mu\text{g/ml}$  and fruits were diluted to  $2000\mu\text{g/ml}$ . *B. thuringiensis*  
123 var. *israelensis* (Bti) strain WG® was used in a concentration of  $0.004\text{g/L}$ , lethal dose specified  
124 by the manufacturer.

125

## 126 **Experimental microcosms and design**

127 We used 300ml plastic cups holding 100ml of dechlorinated water plus the treatment  
128 proposed. In each individual microcosm we added twenty 3<sup>rd</sup> and 4<sup>th</sup> instar *A. aegypti* larvae. Each  
129 container was covered with a mosquito net held by a rubber elastic band. We tested for the effects  
130 of Bti spores, *I. theezans*, *I. paraguariensis* leaves and fruits, respectively and clean aged water  
131 (control) on the *A. aegypti* larval mortality after seven days exposition. Before running the  
132 mortality test, each experimental treatment was aged from one to eight weeks. We considered each  
133 week as one age block with each treatment replicated six times. By doing this experimental design  
134 we assure the independence of each set of treatments. The aged treatments were used to test for

135 larval survival in each experimental week. At the end of the seventh day the larval survival was  
136 recorded. Both pupae and emerged adults were considered survivals. The experiment was  
137 performed for eight weeks (56 days) and carried out between April and May 2017 at the LABENT-  
138 Eco mosquito colony room under controlled conditions of temperature and photoperiod ( $27\pm 3^{\circ}\text{C}$ ,  
139 12h D:L).

140

## 141 **Statistics**

142 Because both negative (Bti) and positive (tap water) control survivor rate was 0.16% and  
143 100%, respectively, we analyzed the data in both ways, with (complete model) and without (simple  
144 model) these two categories. To evaluate differences in percentage of larval mortality (response  
145 variables) in simple (*I. paraguariensis* and *I. theezans*) and complete model (only water, Bti  
146 spores, *I. paraguariensis* and *I. theezans*), week (1 to 8) and interaction between week and  
147 treatment (explicative variables) we used factorial GLM, with binomial correct to quasi-binomial  
148 (link= logit, test= Chi-square) distributions for larval mortality (response variable; [33]). All  
149 GLMs analyzed were corrected for cases of under- or overdispersion.

150 Differences among the categorical variables were assessed through a contrast analysis [33].  
151 In this contrast analysis (orthogonal), the dependent variables of different treatment and weeks  
152 were ordered (increasingly) and tested pairwise (with the closest values). Sequentially these dates  
153 are adding to the model values with no differences and testing with the next in a steps model  
154 simplification (for more see also chapter 9 of Crawley, (2007)). All analyses were performed using  
155 R [34].

156

## 157 **Results**

158 The *A. aegypti* larvae mortality was not affected by water age (positive control). We  
 159 observed no larva deaths independent of the water age used. Oppositely, the Bti lead to zero percent  
 160 of larvae survivorship until the age of 7 weeks, with only 6,6% of larvae alive on the age of 8  
 161 weeks (negative control). In this way, due to these extreme results in controls (0% of mortality in  
 162 positive control and 100% of mortality in negative control), the mortality data were also analyzed  
 163 only between treatments (*I. paraguariensis* and *I. theezans*).

164 The treatment (*I. paraguariensis* and *I. theezans*), week (1 to 8) and interaction factor  
 165 (week:treatment) was significantly different among *A. aegypti* larvae mortality for both GLMs  
 166 models (With and Without positive and negative controls; Table 1). The higher *A. aegypti* larvae  
 167 mortality was found in Bti treatment (negative control), followed to *I. theezans*, *I. paraguariensis*  
 168 and positive control (Table 1; Fig 1a). Also, *I. theezans* hydroalcoholic leaves extract,  
 169 independently of the extract age, significantly killed more *A. aegypti* larvae than the aqueous *I.*  
 170 *paraguariensis* fruits extract (Table 1; Fig 1b).

171  
 172 **Table 1:** Generalized linear models (GLM), degrees of freedom (Df), Residual Deviance (total  
 173 and in ) and p values, comparing the percentage of *Aedes aegypti* larvae mortality after the  
 174 exposure to treatments (water control, *Bacillus thuringiensis israelensis* - Bti, hydroalcoholic dried  
 175 leaves extract of *Ilex theezans* and aqueous *Ilex paraguariensis* fruits extract), time (8 weeks) and  
 176 interaction among treatments and weeks, under laboratory conditions.

| GLM                                    | Df | Resid.      |      | Pr(>Chi) | Analysis of contrast                                              |
|----------------------------------------|----|-------------|------|----------|-------------------------------------------------------------------|
|                                        |    | Resid. Dev. | %    |          |                                                                   |
| a. With positive and negative controls |    |             |      |          |                                                                   |
| Treatments                             | 3  | 132.9       | 74.1 | < 0.001  | Control < <i>Ilex paraguariensis</i> < <i>Ilex theezans</i> < Bti |



|                 |     |      |      |         |                                    |
|-----------------|-----|------|------|---------|------------------------------------|
| Weeks           | 7   | 33.4 | 18.6 | < 0.001 | Week 8 = 7 < 5 < 4 = 6 < 3 = 2 < 1 |
| Treatment:weeks | 21  | 3.0  | 1.7  | < 0.001 |                                    |
| Residual        | 160 | 10.0 | 5.6  |         |                                    |

b. Without positive and negative controls

|                 |    |      |      |         |                                                   |
|-----------------|----|------|------|---------|---------------------------------------------------|
| Treatments      | 1  | 3.1  | 6.6  | < 0.001 | <i>Ilex paraguariensis</i> < <i>Ilex theezans</i> |
| Weeks           | 7  | 32.3 | 68.7 | < 0.001 | Week 8 = 7 < 5 < 4 = 6 < 3 = 2 < 1                |
| Treatment:weeks | 7  | 2.4  | 5.1  | 0.002   |                                                   |
| Residual        | 80 | 9.2  | 19.6 |         |                                                   |

177

178 We observed a positive relationship between *A. aegypti* larvae survivorship and plant  
 179 extract age. We can also say that in general, both *I. paraguariensis* and *I. theezans* kill less (mainly  
 180 after 7 weeks) mosquito larvae as the plant extracts age (Fig MS1). We found higher significant in  
 181 *A. aegypti* larvae mortality in 1 week followed to 2 and 3 weeks, 4 and 6 weeks, 5 weeks and 7  
 182 and 8 weeks (Figs 1b and c).

183

184 **Fig 1. *Aedes aegypti* larvae mortality among treatments (a), sample weeks with positive and**  
 185 **negative controls (b) and sample weeks without positive and negative controls (c) among.**  
 186 Different letters (“a”, “b”, “c”, “d” and “e”) indicate significant differences. Boxes represent the  
 187 quartiles, the bold line represents the median, horizontal dashed line the mean, the vertical dashed  
 188 line represents the upper and lower limits and circles the outliers.

189

190 The residual deviance (estimate to explain the variance of the tested variables) in GLM  
 191 with positive and negative controls, showed that differences in all treatments (74%) was the main  
 192 responsible for the *A. aegypti* larvae mortality followed by weeks (18%; Table 1). On the other  
 193 hand, the residual deviance in GLM without positive and negative controls, showed that

194 differences in all weeks (68%) was the main responsible for the *A. aegypti* larvae mortality  
195 followed by treatments (19%), and only later was explained by treatments (6%; Table 1).

196

197 **Fig MS1: *A. aegypti* larvae survival mean as a function of plant extracts age.**

198 The extracts age are represented by weeks. The circles represent, aqueous *I. paraguariensis* fruits  
199 extract (open) and *I. theezans* hydroalcoholic leaves extract (closed). The asterisks (\*) represents  
200 significant statistical difference between *I. paraguariensis* and *I. theezans* affecting larvae  
201 survival.

202

## 203 **Discussion**

### 204 **Reversal of larvicide effect into food resource over time**

205 *I. theezans* and *I. paraguariensis* extracts are promising against mosquito larvae (if applied  
206 and monitored in the first weeks) and the possibility of using these plants extracts as larvicides for  
207 *A. aegypti* represents. As it is natural extracts and does not leave toxic waste in the environment,  
208 its use may be advantageous. This extracts are an abundant and accessible alternative in southern  
209 Brazil, where *A. aegypti* infestation and dengue cases have been observed in the last decade [9].  
210 However, extracts age caution should be applied on mosquito control attempts. The main idea of  
211 this study is not discouraging the use of such alternative method. We are only concerned in  
212 bringing an advice that we need to be aware about the *Ilex* spp. plant and fruit extract age before  
213 using it for mosquito control purposes. Better results can also be obtained with the development  
214 of additional studies, evaluating the larvicidal activity of pure compounds isolated from these  
215 plants. Also, better results can also be obtained as well as evaluate if there is a supporting effect  
216 of more than one active principle with larvicidal action for *A. aegypti*.

217 It is possible that the plant extracts degrade as the time goes on and these organic compounds  
218 with previous larvicidal activity may become food for *A. aegypti* larvae (corroborate to increase  
219 of importance to residual deviance percentage in GLMs models). The transformation of larvicide  
220 effect into food, especially on those treatments seven and eight weeks old, which displayed the  
221 highest survivorship rate. Because of this apparently plant extract larvicidal effect loss. Therefore,  
222 we recommend that the plant extract age should be considered into attention, caution when using  
223 these extracts in time series, since they may serve as food for bacteria [35]. Finally, plant extract  
224 age will serve as food for the larvae, contributing to its development rather than combat it, in a  
225 negative effect to to mosquito population control.

226

## 227 **A. aegypti larvae mortality between plant extracts**

228 The plant extracts preparation age plays an important role on mosquito larvae mortality  
229 (mainly with positive and negative controls). Despite the plant species and parts and extraction  
230 method, mosquito larval mortality decrease as the plant extracts age. However, the extracts tested  
231 were high efficient in the first weeks of the environment (high mortality). The higher *A. aegypti*  
232 larvae mortality found on *I. theezans* extracts can be in partially explained by the use of solvents  
233 during the extraction process [36]. The hydroalcoholic extraction method, used for *I. theezans*,  
234 extracts reduced polarity chemical constituents from the plant tissues, and these molecules have a  
235 greater ability to penetrate the mosquito larvae cells and modify metabolic activities.

236 On the other hand, aqueous extraction, used for the *I. paraguariensis* fruits, preferentially  
237 removes high polarity chemical compounds which are not able to easily penetrate such cells [36].  
238 Also, *A. aegypti* larvae susceptibility to *I. theezans* may be explained by the presence of secondary  
239 metabolites of the coumarin class and absence of alkaloids when compared to *I. paraguariensis*

240 [37]. Coumarins are part of several plants secondary metabolism being well known for displaying  
241 insecticidal activities, acting as an adult repellent, oviposition deterrence, feeding and growth  
242 inhibition, morphogenetic and hormonal system alterations, sexual behavior changes, adult  
243 sterilization, among others [38]. It is important to point out that in raw plant extracts the active  
244 constituents are usually found in small concentrations [22].

245

## 246 **A. aegypti larvae mortality among week old**

247 In both, *I. theezans* and *I. paraguariensis*, the *A. aegypti* larvae mortality exposed to one-  
248 week old plant extracts was reduced to 100%. However, the plant extracts for both plants' species  
249 decrease the mosquito larvae lethality as the plant extracts age. Those results pointed out the need  
250 to carefully select the right age for a *Ilex* spp. plant extract before using it for mosquito larvae  
251 control purpose. Especially because, regarding to the residual larvicidal power, a product is  
252 considered efficient for a pest population control when it reaches a population reduction above  
253 80% of the individuals, otherwise there is the selection of resistance genes [39].

254 In addition, it is possible that beyond decaying the lethal chemical compounds, which are  
255 toxic for mosquito larvae on the first week. As the time goes on the organic compounds present  
256 on the plant extracts act as a profitable food source for mosquito larvae. In this way, since organic  
257 compounds are well known as being an important component of several larval habitats, forming  
258 the basis of many food webs [40,41]. Microorganisms, such as bacteria, play an important role in  
259 the cycling and breaking of large organic molecules [42]. Therefore, microorganisms may making  
260 them more easily assimilable to aquatic organisms such as mosquito larvae, especially those  
261 belonging to the Culicidae family [40]. As a result of this, decomposing microbial communities

262 present a relevant contribution to the diet of culicid larvae, which end up ingested with the organic  
263 remains over time [40,43–45].

264 Our Bti results lead to 93.4% mortality using the eighth week aged solution. The residual  
265 effect described in the manufacturer's technical manual is 30 days. Also, with the values obtained  
266 in this work being much higher than those described, with a lethality of 100% for 49 days and  
267 6.6% of larval survival up to 56 days. In this way, it was possible to evaluate the effectiveness of  
268 the products that are already being used by the state programs to *A. aegypti* control and combat.  
269 Therefore, testing their effectiveness against the existing vector populations, since the information  
270 obtained could indicate if there is a need insecticides currently used. It should be emphasized here  
271 that the use of the methodology without water renewal in the experiment ends up resulting in a  
272 longer residual effect, not evaluating the impact of water renewal in reducing the residual effect  
273 [46]. It would be important in other studies to simulate the situation in the field of realities where  
274 deposits dominated by permanent emptying and replacement of water, which would probably  
275 contribute to reduction of the residual effect duration for all the treatments tested.

276

## 277 **Conclusions**

278 Our study reinforces the idea of the continuously need to implement alternative methods to  
279 vector control, but there are long term risk. Also, identifying potential alternative pathways for  
280 mosquito population control using natural products originated from the native flora in the short  
281 term. The above described plants have high larvicidal potential against the mosquito *A. aegypti*,  
282 allowing it's easy access by the local population, and contributing to the maintenance of the quality  
283 of life and well-being of the population. As well as reducing public expenditures with vector

284 control and in the treatment of confirmed cases of dengue. Finally, we found that time would  
285 positively affect *A. aegypti* larvae survival due to the plant extracts lethal compounds decay,  
286 corroborating our first hypothesis. We also found that the mortality by *B. thuringiensis* var.  
287 *israelensis* will be constant throughout the experimental period and *A. aegypti* larvae survival will  
288 be lower in the treatments of plant extracts compared to *B. thuringiensis* var. *israelensis*. The high  
289 mortality was observed in *I. theezans* compared to *I. paraguariensis*, corroborating our second  
290 hypothesis. The strongest residual effect of *I. theezans* was probably due to the presence of  
291 chemical on its leaves, such coumarins, hemolytic saponins and cyanogenic glucosides, absent in  
292 *I. paraguariensis*.

293

## 294 **Acknowledgements**

295 The authors thank Unochapecó for the availability of the laboratories use and for the  
296 Research Program for the Unified Health System.

297

## 298 **References**

- 299 1. Weaver SC, Reisen WK. Present and future arboviral threats. *Antiviral Res.*  
300 2010;85(2):328–45.
- 301 2. Lopes N, Nozawa C, Linhares REC. Características gerais e epidemiologia dos arbovírus  
302 emergentes no Brasil. *Rev Pan-Amazônica Saúde.* 2014;5(3):55–64.
- 303 3. Liu N. Insecticide Resistance in Mosquitoes: Impact, Mechanisms, and Research  
304 Directions. *Annu Rev Entomol.* 2015;60(1):537–59.
- 305 4. Apaire-Marchais V, Ogliastro M, Chandre F, Pennetier C, Raymond V, Lapied B. Virus

- 306 and calcium: An unexpected tandem to optimize insecticide efficacy. *Environ Microbiol*  
307 *Rep.* 2016;8(2):168–78.
- 308 5. Sun Y, Dong Y, Li J, Lai Z, Hao Y, Liu P, et al. Development of large-scale mosquito  
309 densovirus production by in vivo methods. *Parasites and Vectors.* 2019;12(1):1–13.
- 310 6. Brasil. Programa Nacional de Controle da Dengue (PNCD). 1st ed. Brasília: Ministério da  
311 Saúde; 2002. Available from: [http://bvsmms.saude.gov.br/bvs/publicacoes/pncd\\_2002.pdf](http://bvsmms.saude.gov.br/bvs/publicacoes/pncd_2002.pdf)
- 312 7. Dengue: Instruções para Pessoal de Combate ao Vetor - Manual de Normas Técnicas. 3rd  
313 ed. Brasília: Ministério da Saúde; 2001.
- 314 8. Crivelenti LZ, Guilherme LC, Morelli S, Borin S. Toxicidade do Inseticida  
315 Organofosforado Abate® em Alevinos de *Poecilia reticulata*. *J Brazilian Soc Ecotoxicol.*  
316 2010;5(2–3):1–13.
- 317 9. Busato MA, Vitorello J, Lutinski JA, Magro JD, Scapinello J. Potencial Larvicida De  
318 *Melia Azedarach L. E Ilex Paraguariensis St. Hil. No Controle De Aedes Aegypti*  
319 *(Linnaeus, 1762) (Diptera: Culicidae).* *Ciência e Nat.* 2015;37(2):277–82.
- 320 10. Tahir U, Khan UH, Zubair MS, Bahar-e-Mustafa. *Wolbachia pipientis*: A potential  
321 candidate for combating and eradicating dengue epidemics in Pakistan. *Asian Pac J Trop*  
322 *Med.* 2015;8(12):989–98.
- 323 11. Guarda C, Lutinski JA, Antônio W, Maria R, Busato A. Susceptibilidade ao inseticida  
324 temefós no controle do *Aedes aegypti* ( *Diptera : Culicidae*). *Interciencia.* 2016;41(4):243–  
325 7.
- 326 12. Baskar K, Sudha V, Nattudurai G, Ignacimuthu S, Duraipandiyar V, Jayakumar M, et al.  
327 Larvicidal and repellent activity of the essential oil from *Atalantia monophylla* on three  
328 mosquito vectors of public health importance, with limited impact on non-target zebra

- 329 fish. *Physiol Mol Plant Pathol*. 2018;101:197–201.
- 330 13. Govindarajan M, Rajeswary M, Senthilmurugan S, Vijayan P, Alharbi NS, Kadaikunnan  
331 S, et al. Larvicidal activity of the essential oil from *Amomum subulatum* Roxb.  
332 (*Zingiberaceae*) against *Anopheles subpictus*, *Aedes albopictus* and *Culex*  
333 *tritaeniorhynchus* (Diptera: Culicidae), and non-target impact on four mosquito natural  
334 enemies. *Physiol Mol Plant Pathol*. 2018;101:219–24.
- 335 14. De Araújo AJ, De Lima JS, Moreira JC, Jacob SDC, Soares MDO, Monteiro MCM, et al.  
336 Exposição múltipla a agrotóxicos e efeitos à saúde: Estudo transversal em amostra de 102  
337 trabalhadores rurais, Nova Friburgo, RJ. *Cienc e Saude Coletiva*. 2007;12(1):115–30.
- 338 15. Zara AL de SA, Santos SM Dos, Fernandes-Oliveira ES, Carvalho RG, Coelho GE.  
339 Estratégias de controle do *Aedes aegypti*: uma revisão. *Epidemiol e Serv saude Rev do*  
340 *Sist Unico Saude do Bras*. 2016;25(2):391–404.
- 341 16. Coelho WMD, Coêlho J de CA, Bresciani KDS, Buzetti WAS. Biological control of  
342 *Anopheles darlingi*, *Aedes aegypti* and *Culex quinquefasciatus* larvae using shrimps.  
343 *Parasite Epidemiol Control*. 2017;2(3):91–6.
- 344 17. Nascimento AKS. O uso do *Bacillus thuringiensis* variedade israelensis , no controle das  
345 larvas do *Aedes aegypti* . M. Sc. Thesis, Centro Universitário de Brasília. 2003. Available  
346 from: [https://docplayer.com.br/15917402-O-uso-do-bacillus-thuringiensis-variedade-](https://docplayer.com.br/15917402-O-uso-do-bacillus-thuringiensis-variedade-israelensis-no-controle-das-larvas-do-aedes-aegypti.html)  
347 [israelensis-no-controle-das-larvas-do-aedes-aegypti.html](https://docplayer.com.br/15917402-O-uso-do-bacillus-thuringiensis-variedade-israelensis-no-controle-das-larvas-do-aedes-aegypti.html)
- 348 18. Soares-da-Silva J, Queirós SG, de Aguiar JS, Viana JL, Neta M dos RAV, da Silva MC, et  
349 al. Molecular characterization of the gene profile of *Bacillus thuringiensis* Berliner  
350 isolated from Brazilian ecosystems and showing pathogenic activity against mosquito  
351 larvae of medical importance. *Acta Trop*. 2017;176(June):197–205.



- 352 19. Gomes PRB, Silva ALS, Pinheiro HA, Carvalho LL, Lima HS, Silva EF, et al. Avaliação  
353 da atividade larvicida do óleo essencial do *Zingiber officinale* Roscoe (Gengibre) frente ao  
354 mosquito *Aedes aegypti*. *Rev Bras Plantas Med.* 2016;18(2):597–604.
- 355 20. Knakiewicz AC, Lutinski JA, Guarda C, Paris A, Belotti A, Busato MA, et al. Larval  
356 susceptibility of *Aedes Aegypti* (L.) (Diptera: Culicidae) to extracts of *Ilex Paraguariensis*  
357 and *Ilex Theezans*. *Rev Bras Ciências Ambient.* 2016;(42):113–20.
- 358 21. Rosa CS, Veras KS, Silva PR, Lopes Neto JJ, Cardoso HLM, Alves LPL, et al.  
359 Composição química e toxicidade frente *Aedes aegypti* L. e *Artemia salina* Leach do óleo  
360 essencial das folhas de *Myrcia sylvatica* (G. Mey.) DC. *Rev Bras Plantas Med.*  
361 2016;18(1):19–26.
- 362 22. Krinski D, Massaroli A, Machado M. Potencial inseticida de plantas da família  
363 Annonaceae. *Rev Bras Frutic.* 2014;36(edição especial):225–42.
- 364 23. Souza MFF. Chá mate (*Ilex paraguariensis*): compostos bioativos e relação com atividade  
365 biológica. M. Sc. Thesis, Universidade de São Paulo; 2009. Available from:  
366 <http://www.teses.usp.br/teses/disponiveis/6/6138/tde-21092009-102503/pt-br.php>
- 367 24. Castaldelli APA, Vieira LP, Przygodda F, Nunes Z, Jorge M. Efeito da erva mate (*Ilex*  
368 *paraguariensis* A. St. -Hill) no comportamento e fisiologia de ratos Wistar. *Rev Bras*  
369 *Biociências.* 2011;9(4):514–9.
- 370 25. Gao H, Liu Z, Wan W, Qu X, Chen M. Aqueous extract of yerba mate tea lowers  
371 atherosclerotic risk factors in a rat hyperlipidemia model. *Phyther Res.* 2013;27(8):1225–  
372 31.
- 373 26. Messina D, Soto C, Méndez A, Corte C, Kemnitz M, Avena V, et al. Efecto  
374 hipolipemiante del consumo de mate en individuos dislipidémicos. *Nutr Hosp.*

- 375 2015;31(5):2131–9.
- 376 27. Conceição EPS, Kaezer AR, Peixoto-Silva N, Felzenszwalb I, De Oliveira E, Moura EG,  
377 et al. Effects of *Ilex paraguariensis* (yerba mate) on the hypothalamic signalling of insulin  
378 and leptin and liver dysfunction in adult rats overfed during lactation. *J Dev Orig Health*  
379 *Dis.* 2017;8(1):123–32.
- 380 28. Athayde ML, Schenkel EP, Gosmann G, Guillaume D. Triterpenoids from the leaves of  
381 *Ilex theezans* Martius ex Reiss. *Acta Farm Bonaer.* 1999;18(1):49–52.
- 382 29. Resende MC, Gama RA. Persistência e eficácia do regulador de crescimento pyriproxyfen  
383 em condições de laboratório para *Aedes aegypti*. *Rev Soc Bras Med Trop.* 2006;39(1):72–  
384 5.
- 385 30. dos Santos RLC, Fayal A da S, Aguiar AEF, Vieira DBR, Póvoa MM. Evaluation of the  
386 residual effect of pyrethroids on *Anopheles* in the Brazilian Amazon. *Rev Saude Publica.*  
387 2007;41(2):276–83.
- 388 31. Guirado MM, Elly H, Campos M De. Alguns aspectos do controle populacional e da  
389 resistência a inseticidas em *Aedes aegypti* ( *Diptera* , *Culicidae* ). *Inst Biociências, Let e*  
390 *Ciências Exatas.* 2009;6(64):5–14.
- 391 32. Brasil. *Farmacopeia Brasileira.* 6th ed. Brasília: Anvisa; 2019.
- 392 33. Crawley MJ. *The R Book.* 1st ed. Chichester: John Wiley e Sons Inc.; 2007.
- 393 34. Venables WN, Smith DM, Team RC. *An Introduction to R.* N Venables e D M Smith  
394 Copyr. 2019;2:105. Available from: [https://cran.r-project.org/doc/manuals/r-release/R-](https://cran.r-project.org/doc/manuals/r-release/R-intro.pdf)  
395 [intro.pdf](https://cran.r-project.org/doc/manuals/r-release/R-intro.pdf)
- 396 35. Albeny-Simões D, Murrell EG, Vilela EF, Juliano SA. A multifaceted trophic cascade in a  
397 detritus-based system : *Ecosphere.* 2015;6(3):1–13.

- 398 36. Lee CC, Houghton P. Cytotoxicity of plants from Malaysia and Thailand used  
399 traditionally to treat cancer. *J Ethnopharmacol.* 2005;100(3):237–43.
- 400 37. Valduga E, Freitas RJS de, Reissmann CB, Nakashima T. Caracterização química da folha  
401 de *Ilex paraguariensis* St. Hil. (Erva-Mate) e de outras espécies utilizadas na adulteração  
402 do mate. *Bol do Cent Pesqui Process Aliment.* 1997;15(1):25–36.
- 403 38. Dietrich F, Aparecida A, Strohschoen G, Schultz G, Deise A. Utilização De Inseticidas  
404 Botânicos Na Agricultura Orgânica De Arroio Do Meio / RS. *Rev Bras Agrocências.*  
405 2011;17(2–4):251–5.
- 406 39. Jagadeesan R, Collins PJ, Nayak MK, Schlipalius DI, Ebert PR. Genetic characterization  
407 of field-evolved resistance to phosphine in the rusty grain beetle, *Cryptolestes ferrugineus*  
408 (*Laemophloeidae*: *Coleoptera*). *Pestic Biochem Physiol.* 2016;127:67–75.
- 409 40. Merritt, R. W.; Dadd, R. H.; Walker ED. Feeding Behavior, Natural Food, And  
410 Nutritional Relationships Of Larval Mosquitos. *Annu Rev Entomol.* 1992;37(1):349–76.
- 411 41. Moore JC, Berlow EL, Coleman DC, De Suiter PC, Dong Q, Hastings A, et al. Detritus,  
412 trophic dynamics and biodiversity. *Ecol Lett.* 2004;7(7):584–600.
- 413 42. Sinsabaugh RL, Linkins AE. Enzymic and chemical analysis of particulate organic matter  
414 from a boreal river. *Freshw Biol.* 1990;23(2):301–9.
- 415 43. Cochran-Stafira DL, Von Ende CN. Integrating bacteria into food webs: Studies with  
416 *Sarracenia purpurea* inquilines. *Ecology.* 1998;79(3):880–98.
- 417 44. Eisenberg JNS, Washburn JO, Schreiber SJ. Generalist feeding behaviors of *Aedes*  
418 *sierrensis* larvae and their effects on protozoan populations. *Ecology.* 2000;81(4):921–35.
- 419 45. Kaufman MG, Walker ED, Smith TW, Merritt RW, Klug MJ. Effects of larval mosquitoes  
420 (*Aedes triseriatus*) and stemflow on microbial community dynamics in container habitats.

- 421           Appl Environ Microbiol. 1999;65(6):2661–73.
- 422   46.   Pontes RJS, Regazzi ACF, Lima JWO, Kerr-Pontes LRS. Efeito residual de apresentações
- 423           comerciais dos larvicidas temefos e *Bacillus thuringiensis israelensis* sobre larvas de
- 424           *Aedes aegypti* em recipientes com renovação de água. Rev Soc Bras Med Trop.
- 425           2005;38(4):316–21.

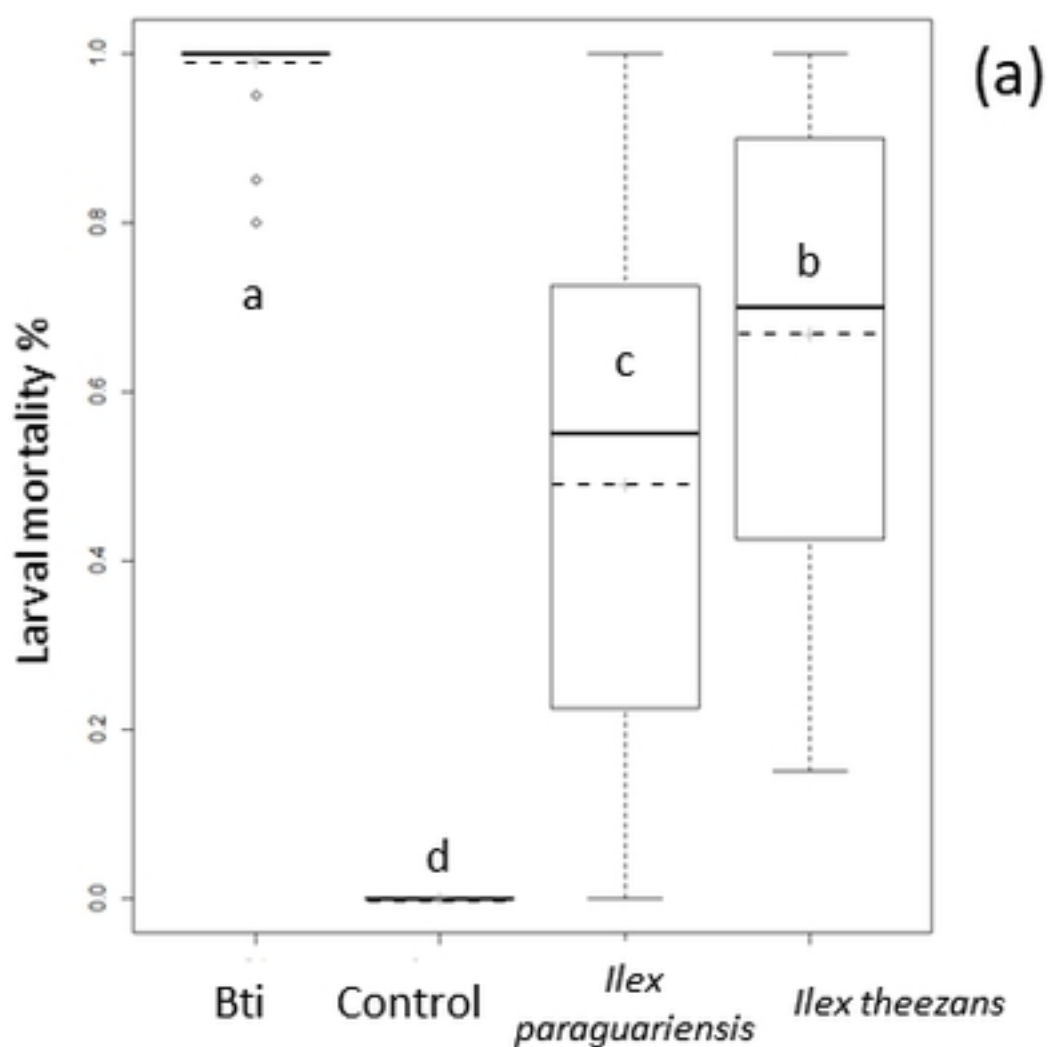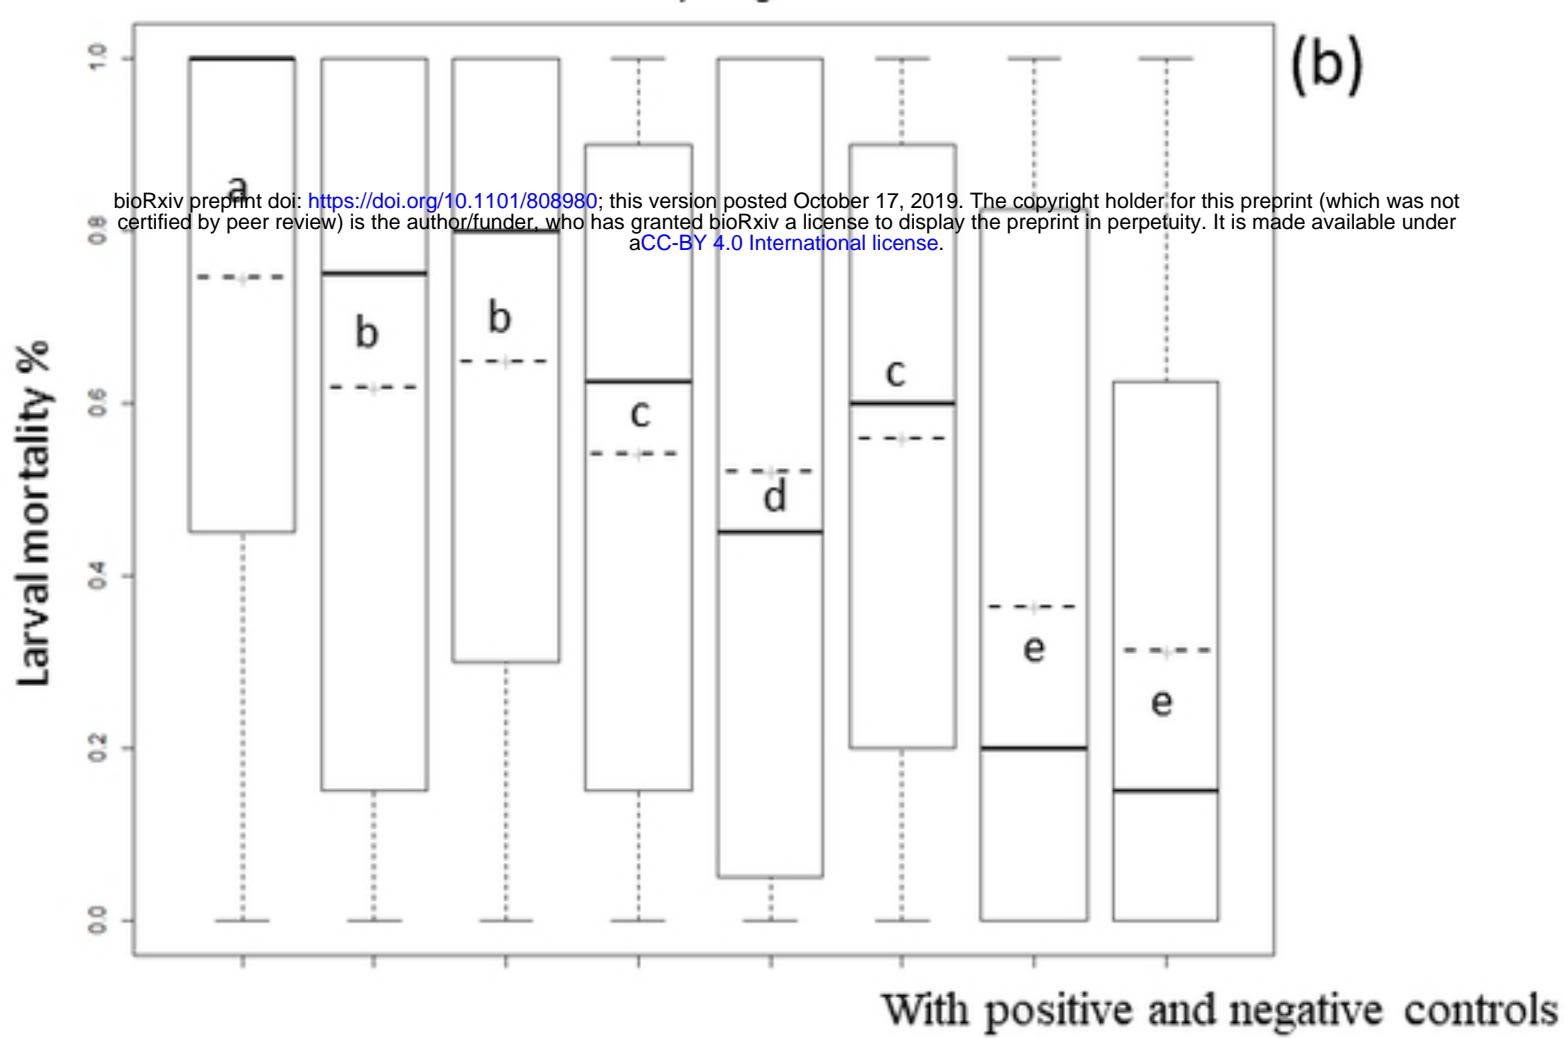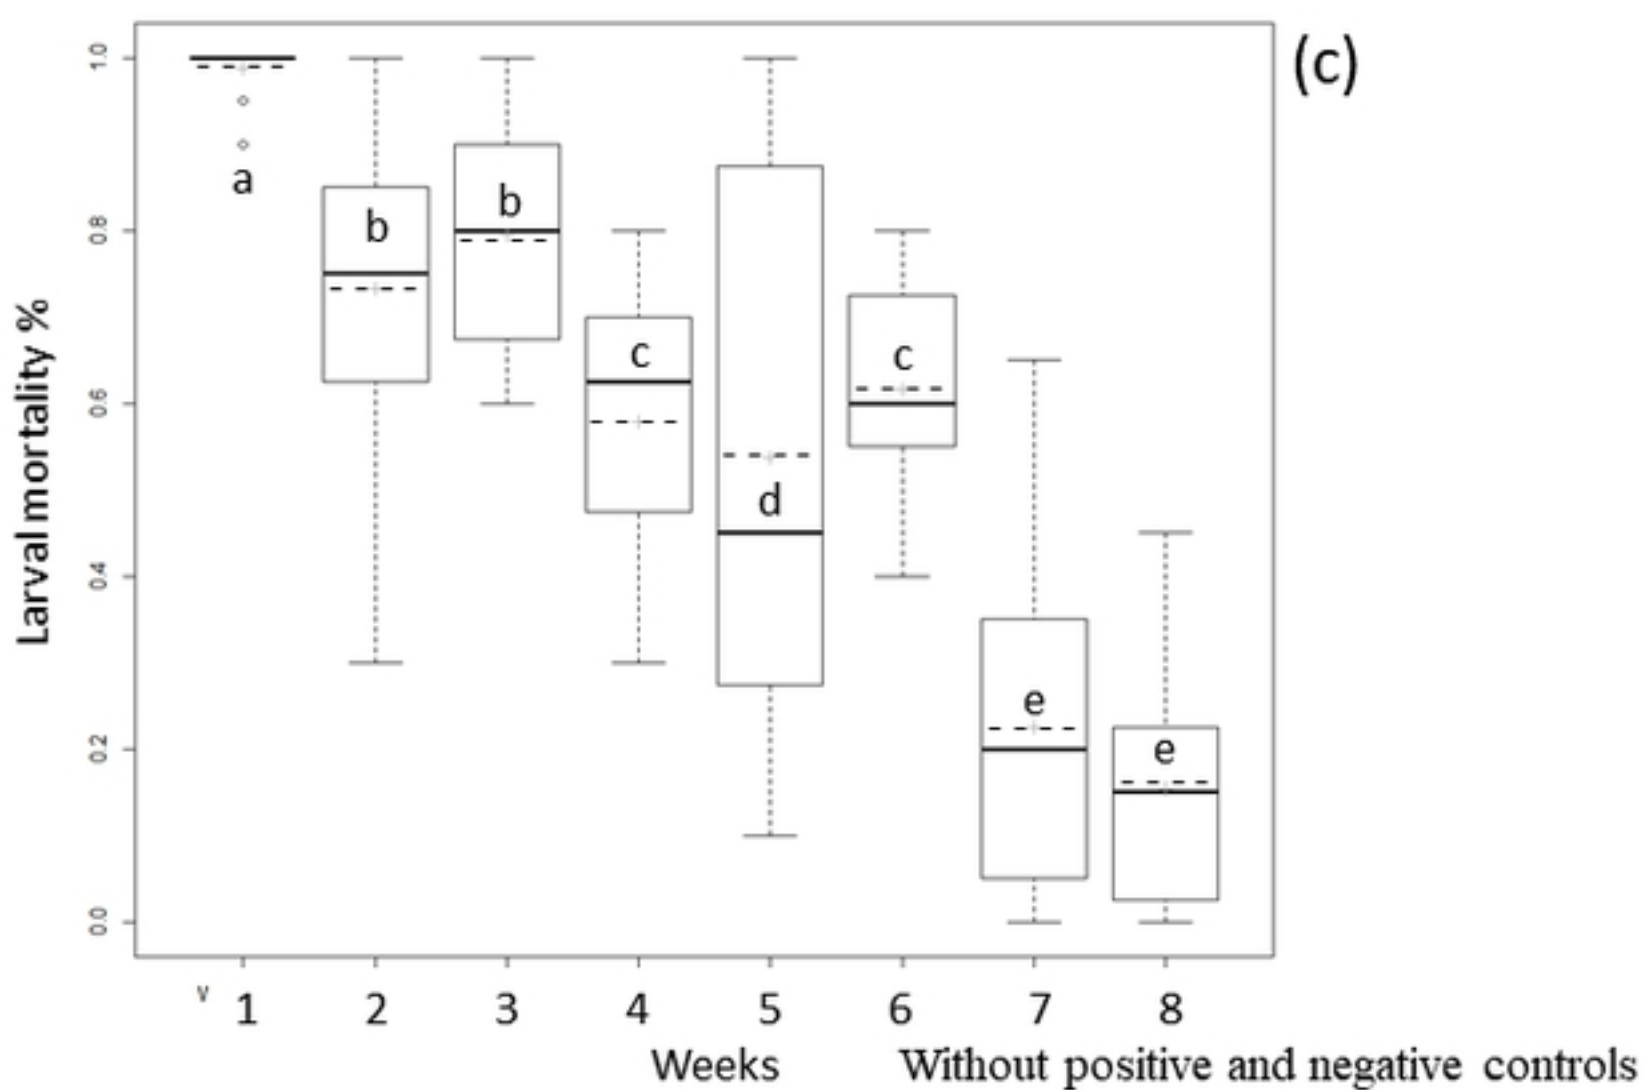

Figure 1

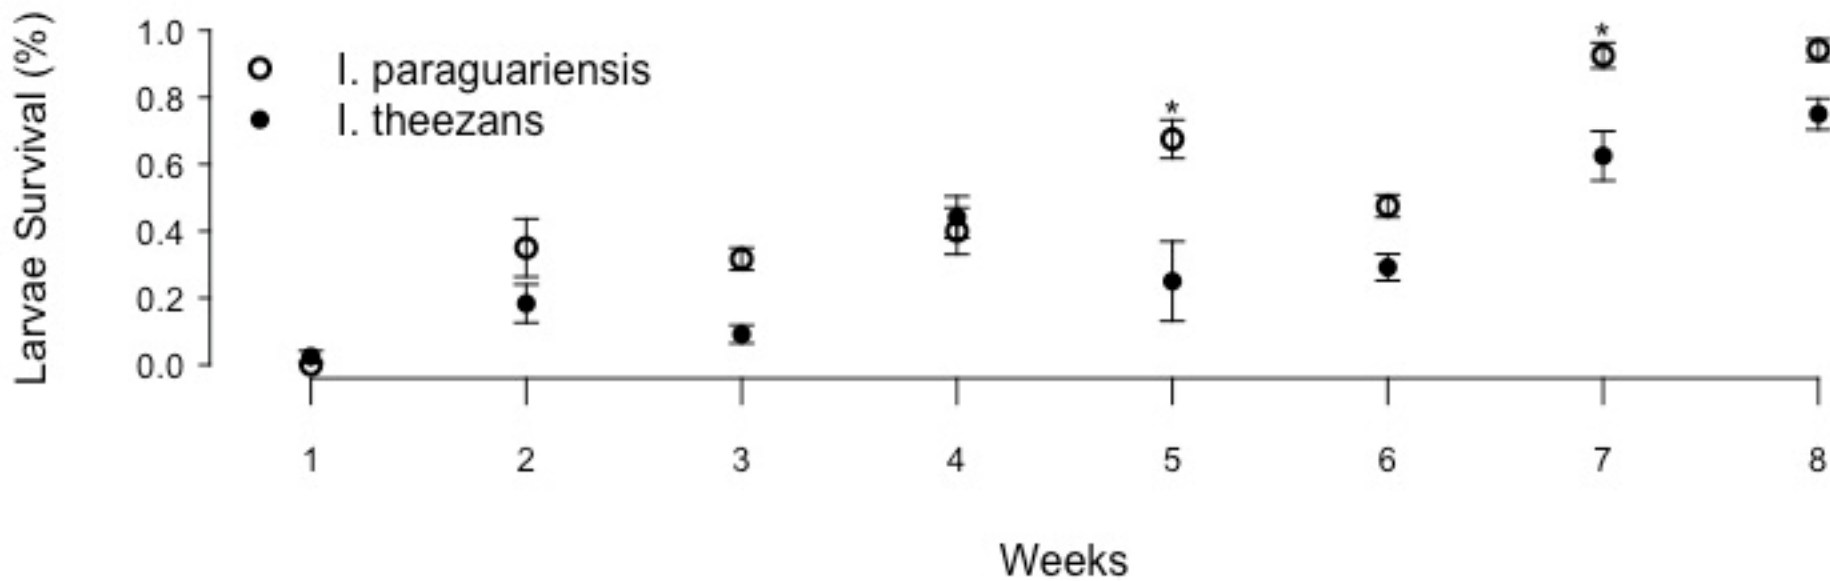

Figure 2
